# Supplementary material for: X-ray and Nuclear Spectroscopies to Reveal the Element-Specific Oxidation States and Electronic Spin States for Nanoparticulated Manganese Cyanidoferrates and Analogs
Source: MDPI journal article supplement (doi:10.3390/physchem4010003), 2023-12-25
Supplement: s1 [file s1]

# X-ray and nuclear spectroscopies to reveal the element specific oxidation states and electronic spin states for nanoparticulated manganese cyanidoferrates and analogs

**Hongxin Wang,<sup>1,\*</sup> Songping D. Huang,<sup>2,\*</sup> Anthony T. Young,<sup>3</sup> Stephen P. Cramer,<sup>1,</sup> Yoshitaka Yoda,<sup>4</sup> and Lei Li<sup>5,†</sup>**

<sup>1</sup> SETI Institute, Mountain View, CA 94043, United States

<sup>2</sup> Department of Chemistry and Biochemistry, Kent State University, Kent, OH 44242, United States

<sup>3</sup> Lawrence Berkeley National Laboratory, Berkeley, CA 94720

<sup>4</sup> Precision Spectroscopy Division, SPring-8/JASRI, Sayo, Hyogo 679-5198, Japan

<sup>5</sup> Synchrotron Radiation Research Center, Hyogo Science and Technology Association, Kouto, Hyogo, 679-5165, Japan

<sup>†</sup> Current address: Institute of Advanced Science Facilities, Shenzhen, China

\* Correspondence: HW hongxin.ucd@gmail.com, SH shuang1@kent.edu

## Summary of Sample Preparation Procedures

**Synthesis of  $K_2Mn[Fe(CN)_6]$ :** First, 0.222 g of PVP (Average MW=40000) was dissolved in 20 ml of  $K_3[Fe(CN)_6]$  (1 mM) solution. Then 20 ml of 1 mM  $MnCl_2$  solution was added dropwise to the above mixture under vigorous stirring. A pale yellow dispersion formed immediately. The reaction mixture was then stirred for another ca. 3 hrs. The reaction product was dialyzed using regenerated cellulose tubular membrane (MWCO is 3.5kDa) against distilled water for 2 days. PVP-coated nanoparticles, denoted as MnPB NPs. Bulk MnPB were prepared by the same method, but without the addition of PVP into the solution. Briefly, 110 mg of  $K_3[Fe(CN)_6]$  in 10 mL of deionized water was added to the aqueous solution (10 mL) of  $MnCl_2 \cdot 4H_2O$  (66 mg) while stirring. The precipitate was separated by centrifugation.

**Synthesis of  $KFe(II)[Co(III)(CN)_6]$ :** an aqueous solution of  $FeCl_2 \cdot 4H_2O$  (1 mM, 15 mL) was added dropwise to an aqueous solution of  $K_3[Co(III)(CN)_6]$  (1 mM, 10 mL) under vigorous stirring. An off-white precipitate was formed slowly, and the reaction was stirred at room temperature for 8 hours before the precipitate was filtered and washed with deionized water and acetone three times each, respectively, to afford a white microcrystalline powder.

**Synthesis of  $K^{57}Fe(II)[Co(III)(CN)_6]$ :** a sample of  $^{57}Fe$  powder was first dissolved in 2 mL concentrated HCl in a small beaker at 50 °C to give a colorless solution. The excess HCl was evaporated at this temperature for 6 hours to dryness before 15 mL deionized water was added to make an aqueous solution of  $FeCl_2$  (1 mM). This colorless solution was added dropwise to an aqueous solution of  $K_3[Co(III)(CN)_6]$  (1 mM, 10 mL) under vigorous stirring. An off-white precipitate was formed slowly, and the reaction was stirred at room temperature for 8 hours before the precipitate was filtered and washed with deionized water and acetone three times each, respectively, to afford a white microcrystalline powder.
